# Supplementary material for: Circulating Lymphocytes, PD-L1 Expression on Tumor-infiltrating Lymphocytes, and Survival of Colorectal Cancer Patients with Different Mismatch Repair Gene Status
Source: PubMed Central journal article supplement — J Cancer. 2019 Apr 5;10(7):1745–54. doi: 10.7150/jca.25187 (PMC6547994; doi:10.7150/jca.25187), 2019-04-05
Supplement: jcav10p1745s1.pdf [file jcav10p1745s1.pdf]

| Variable             | Total                       |      | Enrolled                   |      | P     |
|----------------------|-----------------------------|------|----------------------------|------|-------|
|                      | No. of Patients<br>(n=2657) | %    | No. of Patients<br>(n=169) | %    |       |
| Age, years           |                             |      |                            |      | 0.335 |
| Mean                 | 57.7                        |      | 58.5                       |      |       |
| SD                   | 12.2                        |      | 11.7                       |      |       |
| Gender               |                             |      |                            |      | 0.747 |
| Male                 | 1580                        | 59.5 | 98                         | 58.0 |       |
| Female               | 1077                        | 40.5 | 71                         | 42.0 |       |
| Tumor location       |                             |      |                            |      | 0.128 |
| Right hemicolon      | 652                         | 24.5 | 47                         | 27.8 |       |
| Left hemicolon       | 1197                        | 45.1 | 83                         | 49.1 |       |
| Rectum               | 808                         | 30.4 | 39                         | 23.1 |       |
| Tumor grade          |                             |      |                            |      | 0.892 |
| 1                    | 24                          | 0.9  | 2                          | 1.2  |       |
| 2                    | 1911                        | 71.9 | 123                        | 72.8 |       |
| 3                    | 722                         | 27.2 | 44                         | 26.0 |       |
| Histological subtype |                             |      |                            |      | 0.169 |
| Mucinous             | 365                         | 13.7 | 30                         | 17.8 |       |
| Other                | 2292                        | 86.3 | 139                        | 82.2 |       |
| Tumor stage          |                             |      |                            |      | 0.437 |

|                         |      |      |     |      |       |
|-------------------------|------|------|-----|------|-------|
| T <sub>1</sub>          | 111  | 4.2  | 8   | 4.7  |       |
| T <sub>2</sub>          | 388  | 14.6 | 25  | 14.8 |       |
| T <sub>3</sub>          | 1789 | 67.3 | 120 | 71.0 |       |
| T <sub>4</sub>          | 369  | 13.9 | 16  | 9.5  |       |
| Regional LNs metastasis |      |      |     |      | 0.191 |
| N <sub>0</sub>          | 1729 | 65.1 | 121 | 71.6 |       |
| N <sub>1</sub>          | 620  | 23.3 | 30  | 17.8 |       |
| N <sub>2</sub>          | 308  | 11.6 | 18  | 10.7 |       |
| Perineural invasion     |      |      |     |      | 0.259 |
| Negative                | 2168 | 81.6 | 144 | 85.2 |       |
| Positive                | 489  | 18.4 | 25  | 14.8 |       |
| Vascular invasion       |      |      |     |      | 0.128 |
| Negative                | 2153 | 81.0 | 145 | 85.8 |       |
| Positive                | 504  | 19.0 | 24  | 14.2 |       |
| Number of retrieved LNs |      |      |     |      | 0.336 |
| <12                     | 1147 | 43.2 | 66  | 39.1 |       |
| ≥12                     | 1510 | 56.8 | 103 | 60.9 |       |
| Chemotherapy            |      |      |     |      | 0.577 |
| Yes                     | 1461 | 55.0 | 97  | 57.4 |       |
| No                      | 1196 | 45.0 | 72  | 42.6 |       |
| Radiotherapy            |      |      |     |      | 0.549 |
| Yes                     | 106  | 4.0  | 8   | 4.7  |       |

No

2551

96.0

161

95.3

Abbreviations: SD, Standard Deviation. AJCC, American Joint Committee on Cancer, 7th Edition. LNs, Lymph Nodes.

**Table S1.** Comparison of clinicopathologic characteristics between enrolled and total pMMR CRC patients.

| Characteristic          | Univariate analysis |               |          | Multivariate analysis |               |          |
|-------------------------|---------------------|---------------|----------|-----------------------|---------------|----------|
|                         | HR                  | 95% CI        | <i>P</i> | HR                    | 95%CI         | <i>P</i> |
| Tumor location (rectum) | 2.01                | (1.03, 3.93)  | 0.040    | 3.32                  | (0.71, 15.63) | 0.129    |
| Regional LNs metastasis |                     |               |          |                       |               |          |
| ≥N1                     | 4.70                | (1.54, 14.39) | 0.007    | 0.79                  | (0.16, 3.91)  | 0.768    |
| Distant metastasis      | 10.18               | (3.32, 31.21) | <0.001   | 9.82                  | (2.02, 47.71) | 0.005    |
| AJCC stage ≥3           | 13.55               | (3.00, 61.17) | 0.001    | 7.55                  | (0.85, 67.34) | 0.070    |
| Vascular invasion       | 7.02                | (1.83, 26.84) | 0.004    | 5.84                  | (1.77, 19.33) | 0.004    |
| Number of retrieved     |                     |               |          |                       |               |          |
| LNs (≥12)               | 0.23                | (0.07, 0.75)  | 0.014    | 1.62                  | (0.51, 5.18)  | 0.418    |
| Radiotherapy            | 5.59                | (1.72, 18.18) | 0.004    | 10.51                 | (2.07, 53.35) | 0.005    |
| TIL Numbers (>40)       | 0.46                | (0.15, 1.42)  | 0.177    | -                     | -             | -        |
| PD/L1 expression        |                     |               |          |                       |               |          |
| (Total)                 | 0.45                | (0.15, 1.34)  | 0.149    | 0.96                  | (0.30, 3.11)  | 0.948    |
| PD/L1 expression (TIL)  | 0.69                | (0.45, 1.07)  | 0.095    | 0.42                  | (0.10, 1.77)  | 0.238    |

Abbreviations: HR, Hazard Ratio. dMMR, Mismatch Repair-deficient. pMMR, Mismatch Repair-proficient. AJCC, American Joint Committee on Cancer, 7th Edition. LNs, Lymph Nodes. CA19-9, Carbohydrate Antigen 19-9. PD/L1, Programmed Cell Death 1. TIL, Tumor Infiltrating Lymphocytes.

**Table S2.** Univariate and Multivariate analyses of prognostic factors for overall survival in dMMR patients.

| Characteristic                     | Univariate analysis |                |          | Multivariate analysis |               |          |
|------------------------------------|---------------------|----------------|----------|-----------------------|---------------|----------|
|                                    | HR                  | 95% CI         | <i>P</i> | HR                    | 95%CI         | <i>P</i> |
| Distant metastasis                 | 24.99               | (5.70, 109.56) | <0.001   | 10.67                 | (1.69, 67.23) | 0.012    |
| AJCC stage $\geq 3$                | 13.97               | (1.70, 114.55) | 0.014    | -                     | -             | -        |
| Vascular invasion                  | 7.86                | (1.76, 35.14)  | 0.007    | 19.00                 | (2.63,137.30) | 0.004    |
| No. of retrieved LNs ( $\geq 12$ ) |                     |                | 0.223    | 2.57                  | (0.44,15.06)  | 0.294    |
| Radiotherapy                       | 16.21               | (3.61, 72.78)  | <0.001   | 13.81                 | (0.92,207.83) | 0.058    |
| TIL Numbers (>40)                  | 0.80                | (0.50, 1.27)   | 0.336    | -                     | -             | -        |
| PD/L1 expression (Total)           | 0.39                | (0.10, 1.50)   | 0.171    | 0.23                  | (0.02, 2.38)  | 0.219    |
| PD/L1 expression (TIL)             | 0.70                | (0.41, 1.20)   | 0.195    | 0.24                  | (0.02, 2.79)  | 0.254    |

Abbreviations: HR, Hazard Ratio. dMMR, Mismatch Repair-deficient. pMMR, Mismatch Repair-proficient. AJCC, American Joint Committee on Cancer, 7th Edition. LNs, Lymph Nodes. CA19-9, Carbohydrate Antigen 19-9. PD/L1, Programmed Cell Death 1. TIL, Tumor Infiltrating Lymphocytes.

**Table S3.** Univariate and Multivariate analyses of prognostic factors for overall survival in pMMR patients.

| Characteristic                                        | Univariate analysis |               |          | Multivariate analysis |               |          |
|-------------------------------------------------------|---------------------|---------------|----------|-----------------------|---------------|----------|
|                                                       | HR                  | 95% CI        | <i>P</i> | HR                    | 95%CI         | <i>P</i> |
| Tumor location                                        |                     |               |          |                       |               |          |
| (Rectum)                                              | 5.09                | (2.19, 11.82) | <0.001   | 1.41                  | (0.37, 5.36)  | 0.615    |
| Regional LNs                                          |                     |               |          |                       |               |          |
| metastasis $\geq$ N1                                  | 3.55                | (1.73, 7.27)  | 0.001    | 1.58                  | (0.20, 12.46) | 0.667    |
| Distant metastasis                                    | 5.89                | (2.52, 13.78) | <0.001   | 3.39                  | (1.40, 8.19)  | 0.007    |
| AJCC stage $\geq$ 3                                   | 4.60                | (2.18, 9.69)  | <0.001   | 1.56                  | (0.15, 16.14) | 0.711    |
| Vascular invasion                                     | 4.02                | (1.51, 10.74) | 0.006    | 4.43                  | (1.56, 12.63) | 0.005    |
| Number of retrieved LNs <12                           | 3.78                | (1.80, 7.94)  | <0.001   | 2.52                  | (0.94, 6.75)  | 0.066    |
| Chemotherapy                                          | 2.85                | (1.34, 6.07)  | 0.006    | 1.15                  | (0.41, 3.24)  | 0.786    |
| Radiotherapy                                          | 9.51                | (4.40, 20.57) | <0.001   | 9.64                  | (4.28, 21.71) | <0.001   |
| CEA ( $\geq$ 5 ug/ml)                                 | 2.91                | (1.40, 6.05)  | 0.004    | 1.85                  | (0.61, 5.59)  | 0.277    |
| Lymphocyte ( $\geq$ 1.12 $\times$ 10 <sup>9</sup> /l) | 2.92                | (1.35, 6.29)  | 0.006    | 1.28                  | (0.38, 4.23)  | 0.691    |
| TIL Numbers (>40)                                     | 1.33                | (0.56, 3.19)  | 0.519    | -                     | -             | -        |
| PD/L1 expression (Total)                              | 0.41                | (0.20, 0.84)  | 0.015    | 0.65                  | (0.24, 1.75)  | 0.392    |
| PD/L1 expression (TIL)                                | 3.14                | (1.34, 7.33)  | 0.008    | 0.61                  | (0.20, 1.88)  | 0.384    |

Abbreviations: HR, Hazard Ratio. dMMR, Mismatch Repair-deficient. pMMR, Mismatch Repair-proficient. AJCC, American Joint Committee on Cancer, 7th Edition. LNs, Lymph Nodes. CA19-9, Carbohydrate Antigen 19-9. PD/L1, Programmed Cell Death 1. TIL, Tumor Infiltrating Lymphocytes.

**Table S4.** Univariate and Multivariate analyses of prognostic factors or disease-free survival in dMMR patients.

| Characteristic                              | Univariate analysis |                |          | Multivariate analysis |                |          |
|---------------------------------------------|---------------------|----------------|----------|-----------------------|----------------|----------|
|                                             | HR                  | 95% CI         | <i>P</i> | HR                    | 95%CI          | <i>P</i> |
| Distant metastasis                          | 24.99               | (5.70, 109.56) | <0.001   | 7.36                  | (0.66, 82.50)  | 0.106    |
| AJCC stage $\geq 3$                         | 13.97               | (1.70, 114.55) | 0.014    | 2.13                  | (0.15, 30.76)  | 0.579    |
| Vascular invasion                           | 7.86                | (1.76, 35.14)  | 0.007    | 12.91                 | (1.54, 108.26) | 0.018    |
| Radiotherapy                                | 16.21               | (3.61, 72.78)  | <0.001   | 22.42                 | (1.52, 331.10) | 0.024    |
| Lymphocyte<br>( $\geq 1.12 \times 10^9/l$ ) | 3.07                | (0.78, 12.16)  | 0.110    | 0.70                  | (0.11, 4.58)   | 0.710    |
| TIL Numbers (>40)                           | 0.33                | (0.09, 1.38)   | 0.132    | -                     | -              | -        |
| PD/L1 expression<br>(Total)                 | 0.39                | (0.10, 1.50)   | 0.171    | 0.23                  | (0.03, 4.44)   | 0.244    |
| PD/L1 expression<br>(TIL)                   | 0.35                | (0.07, 1.72)   | 0.195    | 0.37                  | (0.02, 2.69)   | 0.430    |

Abbreviations: HR, Hazard Ratio. dMMR, Mismatch Repair-deficient. pMMR, Mismatch Repair-proficient. AJCC, American Joint Committee on Cancer, 7th Edition. LNs, Lymph Nodes. CA19-9, Carbohydrate Antigen 19-9. PD/L1, Programmed Cell Death 1. TIL, Tumor Infiltrating Lymphocytes.

**Table S5.** Univariate and Multivariate analyses of prognostic factors or disease-free survival in pMMR patients.

Fig. S1

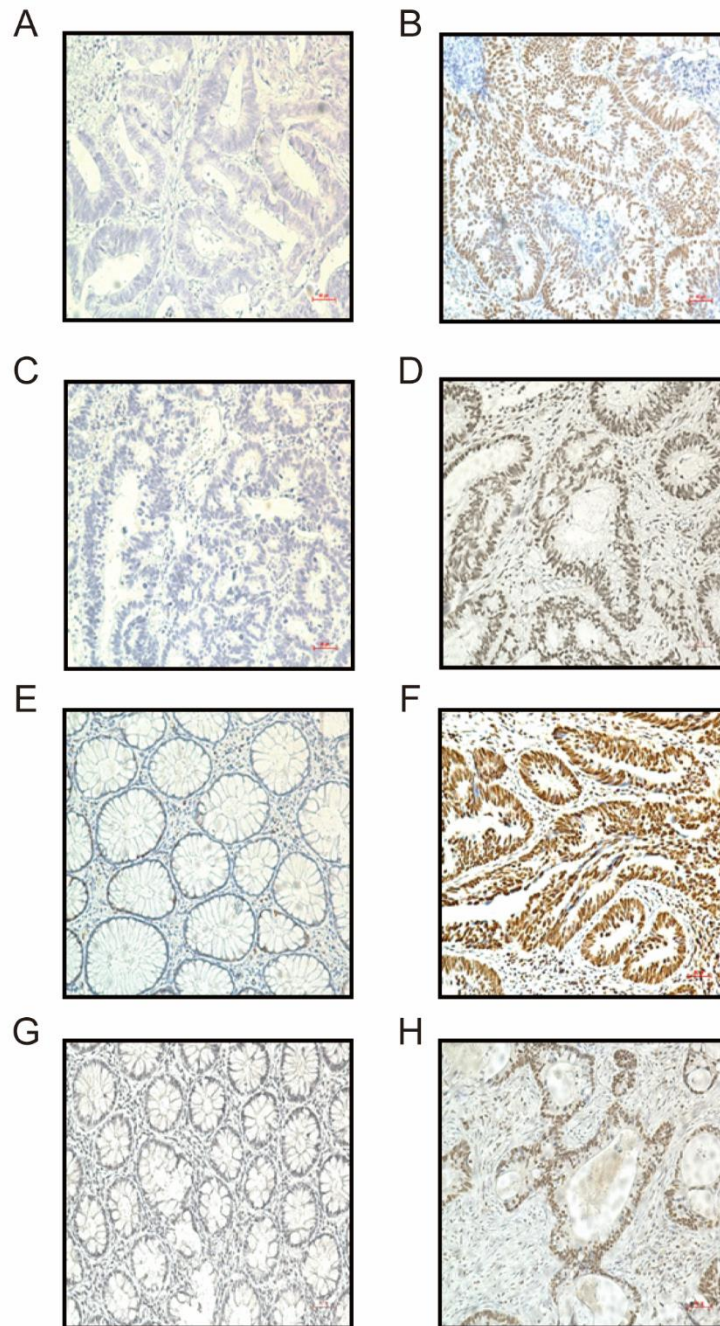

**The representative results of IHC staining of MMR proteins.** (A) MLH1 negative (200×); (B) MLH1 positive (200×); (C) MSH2 negative (200×); (D) MSH2 positive (200×); (E) MSH6 negative (200×); (F) MSH6 positive (200×); (G) PMS2 negative (200×); (H) PMS2 positive (200×).

Fig. S2

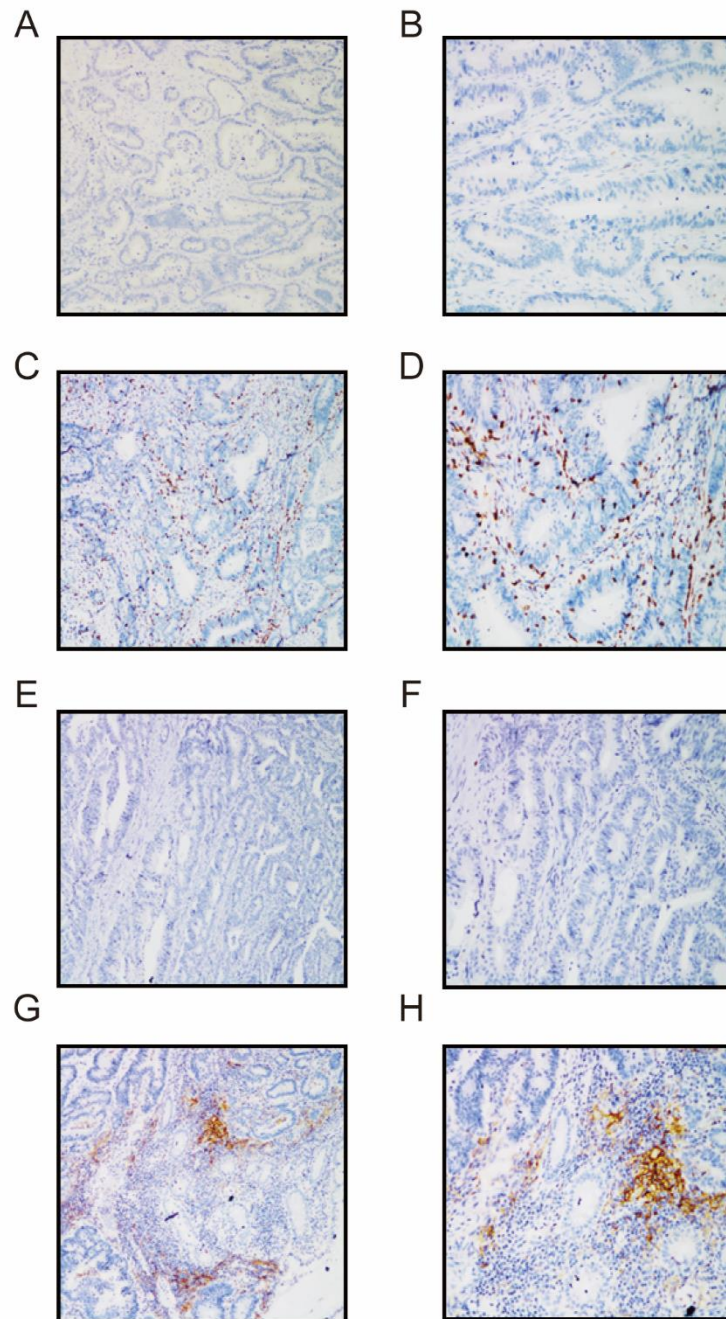

**The representative results of IHC staining of PD-1 and PD-L1.** (A) PD-1 negative (100 $\times$ ); (B) PD-1 negative (200 $\times$ ); (C) PD-1 positive (100 $\times$ ); (D) PD-1 positive (200 $\times$ ); (E) PD-L1 negative (100 $\times$ ); (F) PD-L1 negative (200 $\times$ ); (G) PD-L1 positive (100 $\times$ ); (H) PD-L1 positive (200 $\times$ ).



Fig. S3

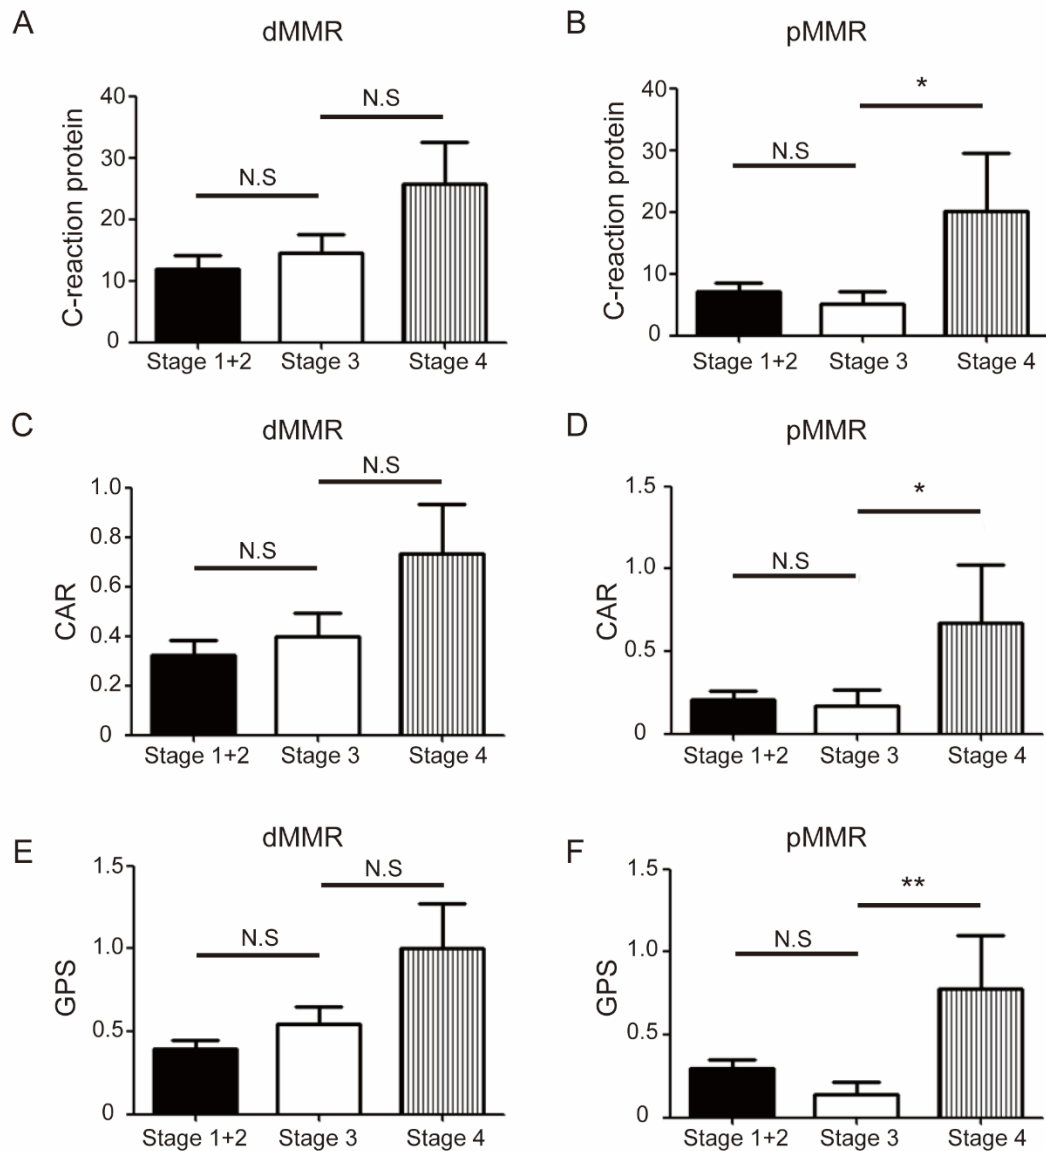

**Inflammatory status difference between dMMR and pMMR CRC patients.** (A-B). Group comparison combined the level of circulating serum C-reaction protein and AJCC stages in dMMR (A) or pMMR patients (B). (C-D) Group comparison combined the level of CAR and AJCC stages in dMMR (C) or pMMR patients (D). (E-F). Group comparison combined the level of GPS status and AJCC stages in dMMR (E) or pMMR patients (F). \* P<0.05, \*\* P<0.01, N.S, not significant.

Fig. S4

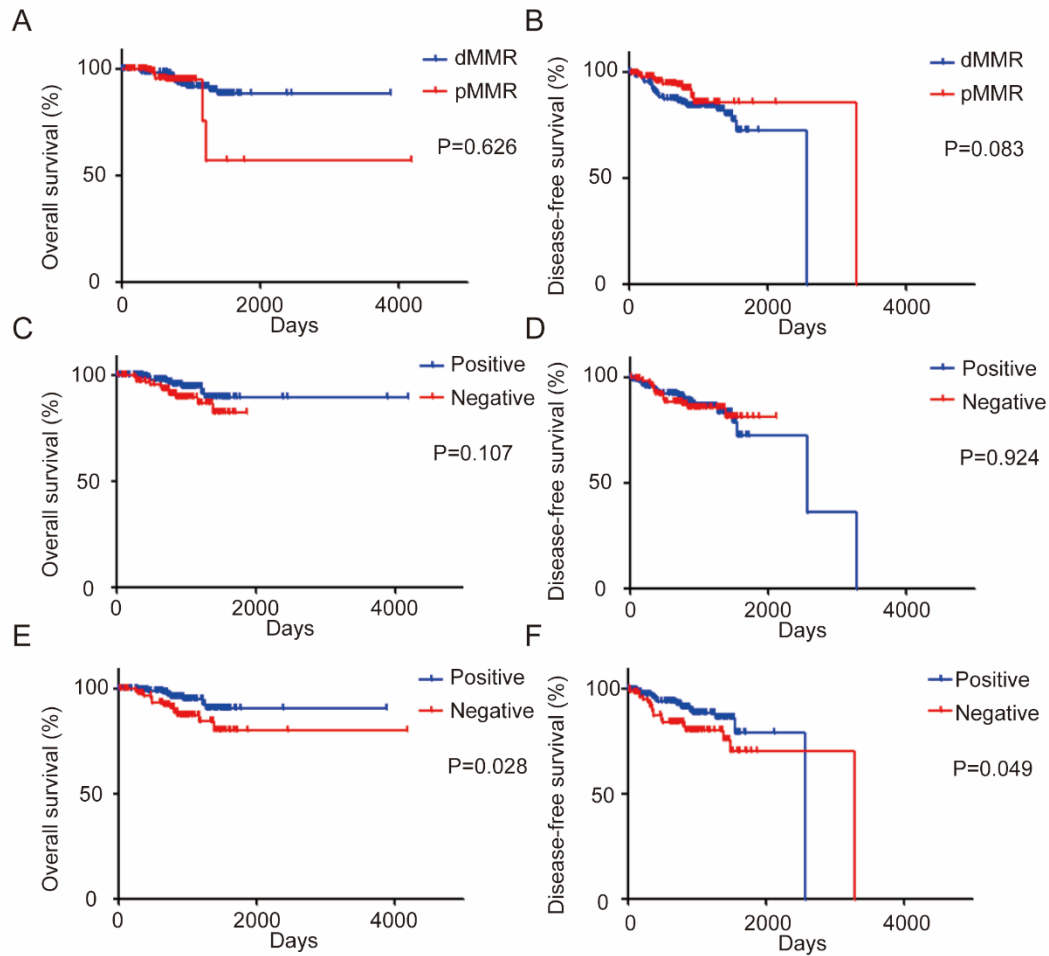

**Different association of PD-1 and PD-L1 expression with survival between dMMR and pMMR CRC patients.** (A-B). Kaplan-Meier survival curves comparing the overall survival (A), and the disease-free survival (B) of the CRC patients with different MMR status. (C-D) Kaplan-Meier survival curves comparing the overall survival (C) and the disease-free survival (D) of the level of total PD-1 expression in CRC patients. (E-F). Kaplan-Meier survival curves comparing the overall survival (E) and the disease-free survival (F) of the level of total PD-L1 in CRC patients. \*  $P < 0.05$ , \*\*  $P < 0.01$ , N.S, not significant.

Fig. S5

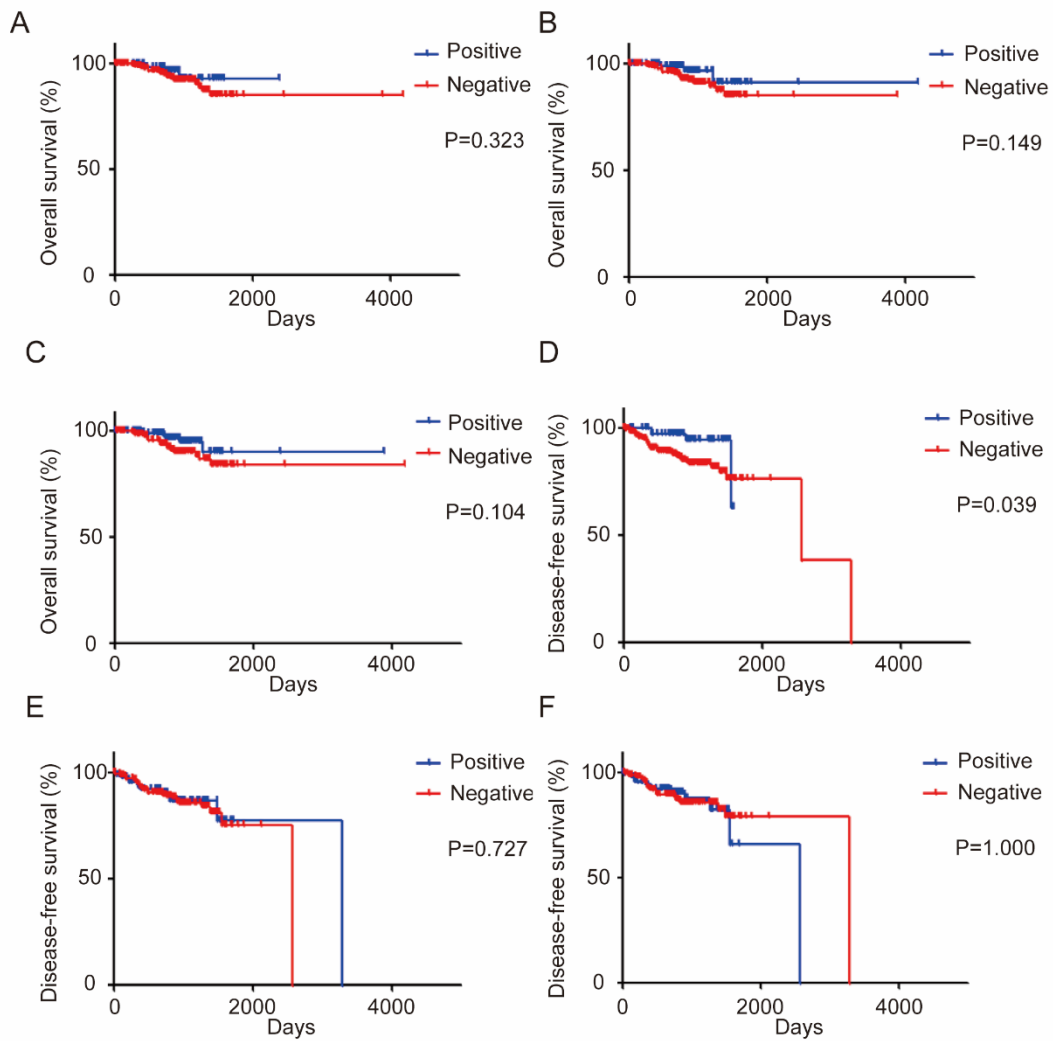

**PD-1 expression at different locations are differently associated with CRC patient survival.** (A-C). Kaplan-Meier survival curves comparing the overall survival of the level of tumor PD-1 (A), stroma PD-1 (B), or TIL PD-1 (C) expression in CRC patients. (d-f). Kaplan-Meier survival curves comparing the disease-free survival of the level of tumor PD-1 (D), stroma PD-1 (E), or TIL PD-1 expression (F) in CRC patients.
